# Supplementary material for: Identification and characterization of the peroxin 1 gene MoPEX1 required for infection-related morphogenesis and pathogenicity in Magnaporthe oryzae
Source: PubMed Central journal article supplement (PMC5099783; doi:10.1038/srep36292), 2016-11-08
Supplement: srep36292-s1.pdf [file srep36292-s1.pdf]

**Identification and characterization of the peroxin 1  
gene *MoPEX1* required for infection-related  
morphogenesis and pathogenicity in *Magnaporthe  
oryzae***

Shuzhen Deng<sup>1</sup>, Zhuokan Gu<sup>2</sup>, Nan Yang<sup>1</sup>, Ling Li<sup>3</sup>, Xiaofeng Yue<sup>1</sup>,  
Yawei Que<sup>1</sup>, Guochang Sun<sup>2</sup>, Zhengyi Wang<sup>1\*</sup> and Jiaoyu Wang<sup>2\*</sup>

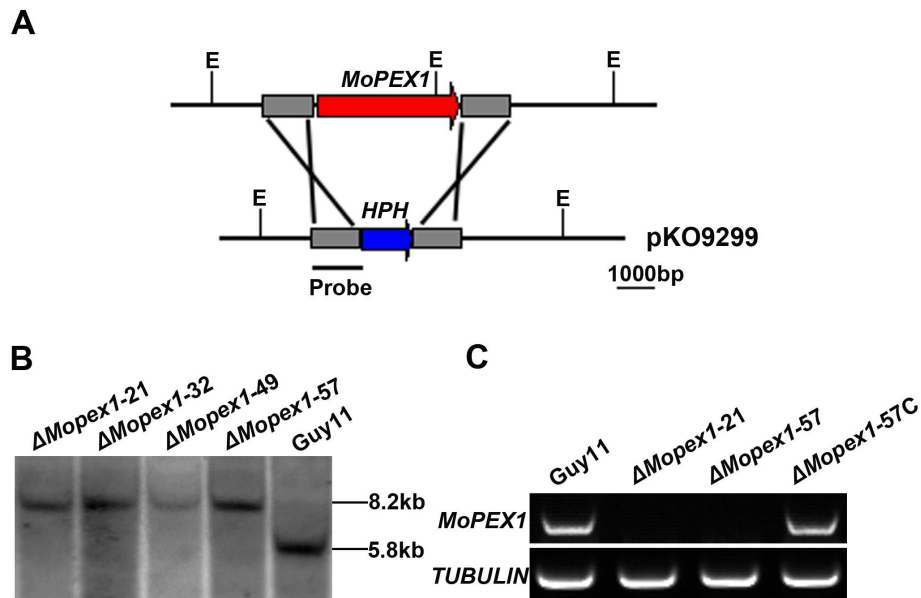

**Figure S1. Targeted gene replacement of *MoPEX1*.**

(A). Construction of the knockout vector pKO9299 and targeted gene replacement of *MoPEX1*. E : *EcoRV*. (B). Southern blot analysis. The genomic DNAs of the wild-type strain Guy11 and four potential *ΔMopex1* null mutants were digested with *EcoRV* and then probed with a 1.5-kb fragment amplified with the primers LB-F and LB-R. (C). RT-PCR was used to confirm the loss of *MoPEX1* transcripts from the two *ΔMopex1* null mutants. Expression of *TUBULIN* (MGG\_00604) encoding  $\beta$ -tubulin was used as a control.

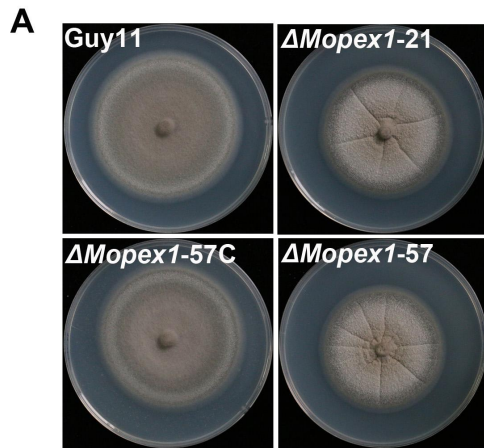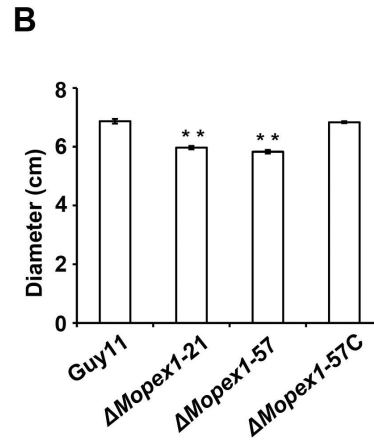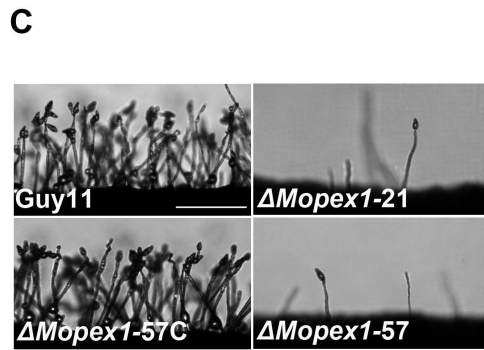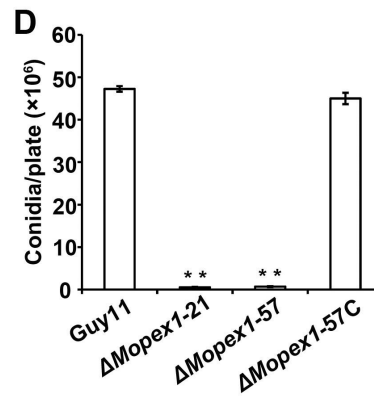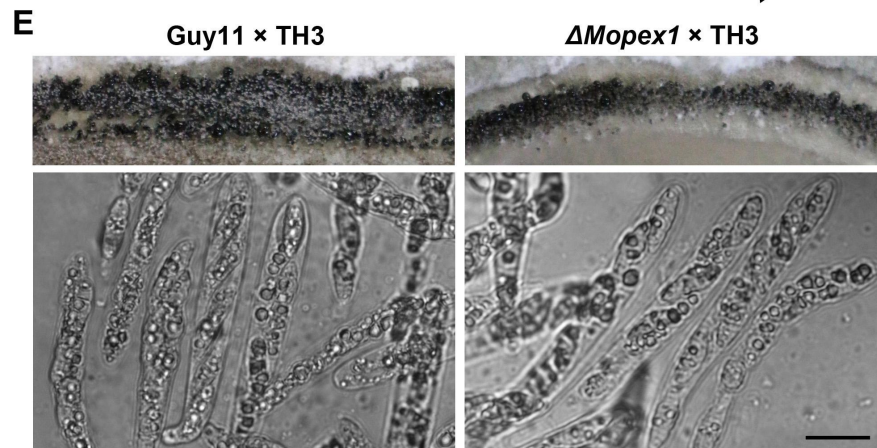

**Figure S2. *MoPEX1* is required for conidiation.**

(A). Colonial morphology of the wild-type strain (Guy11), two  $\Delta Mopex1$  null mutants ( $\Delta Mopex1-21$  and  $\Delta Mopex1-57$ ) and the complemented strain ( $\Delta Mopex1-57C$ ). Photographs were taken after incubating on complete medium (CM) at 25 °C for 10 days. (B). Bar chart showing the colony diameters of the strains. (C). Microscopic observation of conidial development. Aerial hyphae and conidiophores were significantly reduced in the  $\Delta Mopex1$  null mutants. Bars = 100  $\mu\text{m}$ . (D). Bar chart showing the conidial production. Conidia were harvested from 10-day-old (CM) cultures of the strains. (E). Fertility assay. Both Guy11  $\times$  TH3 and  $\Delta Mopex1-57 \times$  TH3 formed numerous perithecia at the junctions on OMA medium after 4-week incubation in an inductive condition. Bars = 20  $\mu\text{m}$ .

Means and standard deviations were calculated based on three independent experiments.

Statistical difference is indicated by asterisks ( $P < 0.01$ ).

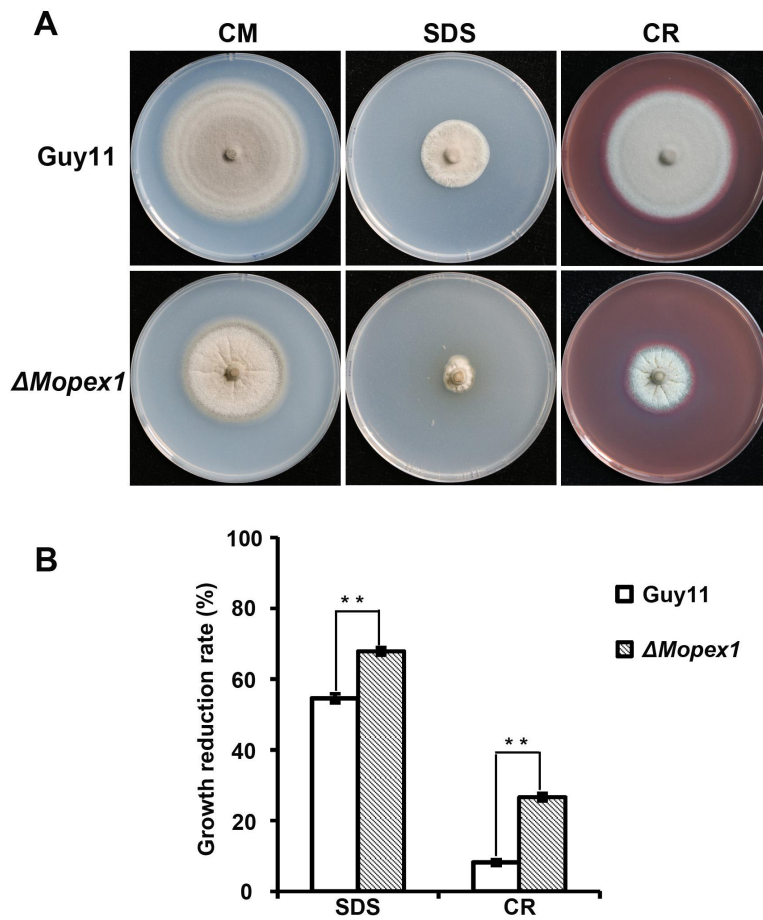

**Figure S3. Cell wall integrity test of the wild-type strain Guy11 and the  $\Delta Mopex1$  mutant.**

(A). The wild type Guy11 and the  $\Delta Mopex1$ -57 mutant were cultured on CM and CM supplied with 0.01% SDS or 200  $\mu\text{g ml}^{-1}$  Congo Red (CR) for 10 days. (B). Growth reduction rates of colony growth on CM supplied with SDS or Congo Red (CR).

Means and standard deviations were calculated based on three independent experiments.

Statistical difference is indicated by asterisks ( $P < 0.01$ ).

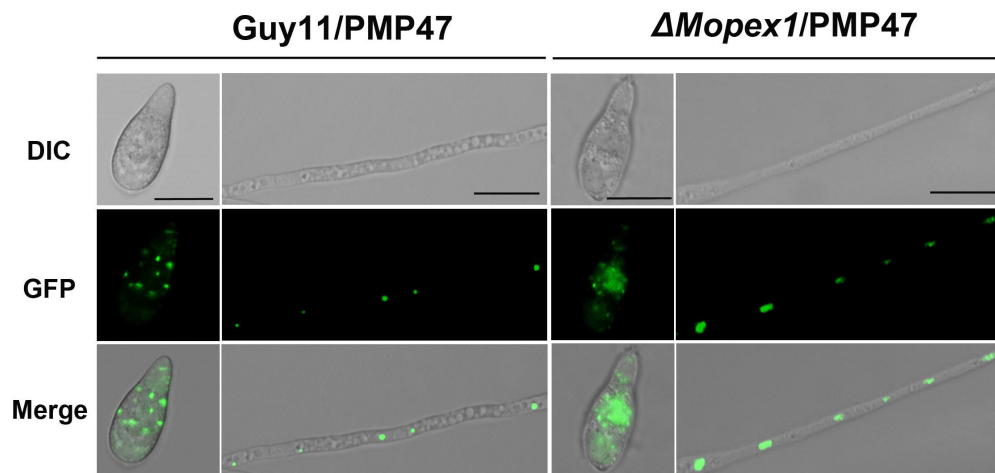

**Figure S4. Distribution of the PMPs in the  $\Delta Mopex1$  mutant.**

The wild-type strain Guy11 and the  $\Delta Mopex1$ -57 mutant were transformed with GFP-PMP47.

Conidia and hyphae from the transformants Guy11/GFP-PMP47 and  $\Delta Mopex1$ /GFP-PMP47 were observed under a confocal fluorescence microscopy. Bars = 10  $\mu$ m.

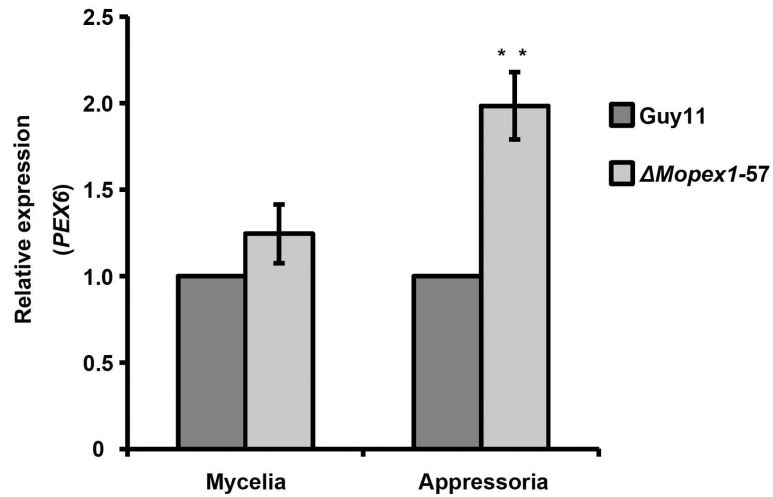

**Figure S5. Expression of *MoPEX6* in the wild-type strain Guy11 and the  $\Delta Mopex1$  mutant.**

Quantitative RT-PCR analysis of relative expression of *MoPEX6* in the wild-type strain Guy11 and the  $\Delta Mopex1-57$  mutant. RNA samples were extracted from mycelia (2-day-old CM liquid culture) and appressoria formed on barley epidermis for 24 h.

Means and standard deviations were calculated based on three independent experiments.

Statistical difference is indicated by asterisks ( $P < 0.01$ ).

**Table S1. Strains used in this study**

| <b>Name</b>               | <b>Brief description</b>                          |
|---------------------------|---------------------------------------------------|
| Guy11                     | The wild-type strain of <i>Magnaporthe oryzae</i> |
| C445                      | The T-DNA insertional mutant                      |
| TH3                       | A standard tester strain for fertility assay      |
| <i>ΔMopex1-21</i>         | The <i>ΔMopex1</i> null mutant                    |
| <i>ΔMopex1-32</i>         | The <i>ΔMopex1</i> null mutant                    |
| <i>ΔMopex1-49</i>         | The <i>ΔMopex1</i> null mutant                    |
| <i>ΔMopex1-57</i>         | The <i>ΔMopex1</i> null mutant                    |
| <i>ΔMopex1-57C</i>        | The complemented strain                           |
| Guy11/GFP-PTS1            | The wild-type strain expressing GFP-PTS1          |
| <i>ΔMopex1</i> /GFP-PTS1  | The <i>ΔMopex1</i> mutant expressing GFP-PTS1     |
| Guy11/PTS2-GFP            | The wild-type strain expressing PTS2-GFP          |
| <i>ΔMopex1</i> /PTS2-GFP  | The <i>ΔMopex1</i> mutant expressing PTS2-GFP     |
| GDW2                      | The strain expressing GFP-MoPEX1 and RFP-PTS1     |
| Guy11/GFP-PMP47           | The wild-type strain expressing GFP-PMP47         |
| <i>ΔMopex1</i> /GFP-PMP47 | The <i>ΔMopex1</i> mutant expressing GFP-PMP47    |
| AGL1                      | <i>Agrobacterium tumefaciens</i>                  |
| DH-5 $\alpha$             | <i>Escherichia coli</i>                           |



**Table S2. Primers used in this study**

| Name       | Sequence (5'-3')                              | Usage                                 |
|------------|-----------------------------------------------|---------------------------------------|
| ATMThb F   | TCCCCGGGCTGCAGGAATTCCCTCGTGATGATACCGCTA       | Complementation of C445               |
| ATMThb R   | GATAAGCTTGATATCGAATTCGATATACACAAACAGTTAGG     |                                       |
| LB F       | GGATCCCCGGGCTGCAGGAATTCAGCACATCAAGAACATCGTC   | <i>MoPEX1</i>                         |
| LB R       | CCTTCAATATCAGTTATCGAATTCAACTAGTTCTAGCAGATCATG | knockout                              |
| RB F       | CTTATCGATACCGTCGACCTCGAGTGTCTTAACCTAACTGTTTG  |                                       |
| RB R       | GGTACCGGGCCCCCCTCGAGAGGCGCTAGCTAGTTTGAC       |                                       |
| check up   | GCAGAGAATGGTAAGTGTC                           | Confirming the <i>ΔMopex1</i> mutants |
| check down | CGCCGAGTATGTCAACGTC                           |                                       |
| Hph up     | GACAGACGTCGCGGTGAGTT                          |                                       |
| Hph down   | GTCCGAGGGCAAAGAAATAG                          |                                       |
| Tublin F1  | GTTCACCTTCAGACCGG                             |                                       |
| Tublin R1  | GAGATCGACGAGGACAG                             |                                       |
| PSZ1 SF4   | ACCACACCACTTACTTTACC                          |                                       |
| RT-SR      | CGAGATCGTC CAGTATCAC                          |                                       |
| 9299nGFP F | GGATCCCCGGGCTGCAGGAATTCTGTATAAGGAGTAGGCAA     | <i>MoPEX1</i> native promoter         |
| promGFP R  | TCCTCGCCCTTGCTCACCATTATGTGTGTGTGTCTTGA        |                                       |
| GFP F      | ATGGTGAGCAAGGGCGAGGA                          | <i>MoPEX1</i>                         |
| GFP R      | CTTGACAGCTCGTCCATGC                           | N-terminal GFP fusion                 |
| 9299cGFP F | GCATGGACGAGCTGTACAAGGCTCCACGAAAGAACGGGC       |                                       |
| 9299GFP R  | GATAAGCTTGATATCGAATTCAGACTCCTGGTGGGCTGGC      |                                       |
| 9299 AD F  | GGCCATGGAGGCCAGTGAATTCATGGCTCCACGAAAGAACGG    | <i>MoPEX1</i> cDNA amplification      |
| 9299 AD R  | TGCCACCCGGGTGGAATTCCTACATCAAGCTAGAACGT        |                                       |
| PEX6 BK F  | GGCCATGGAGGCCGAATTCATGGACCCGGCGCAAACCC        | <i>MoPEX6</i> cDNA amplification      |
| PEX6 BK R  | TCGACGGATCCCCGGGAATCCTCAATCGTACAAGCCCTCAT     |                                       |
| βtub-q-F   | CATACGGTGACCTGAACTAC                          | qRT-PCR analysis                      |
| βtub-q-R   | CCATGAAGAAGTGCAGACG                           |                                       |

---

|          |                      |
|----------|----------------------|
| ALB1-q-F | TGACACCTTCCTCAACACC  |
| ALB1-q-R | CGAGCCAGATTTAAGCAGCC |
| BUF1-q-F | TACAAGCACCTCGAGATTGG |
| BUF1-q-R | CAGTAATCTTCTTGTCGGCC |
| RSY1-q-F | TTCCTCGACAAGCTCTGG   |
| RSY1-q-R | GTGTCCTTGTACCTCTGGTG |
| PEX6-q-F | CAATTGTGAACCGGCTCC   |
| PEX6-q-R | ATATCGCGGCATGTGTCGG  |

---
